# Supplementary material for: Niacin‐mediated Tace activation ameliorates CMT neuropathies with focal hypermyelination
Source: PubMed Central journal article supplement (PMC5167133; doi:10.15252/emmm.201606349), 2016-10-31
Supplement: EMMM-8-1438-s001.pdf [file EMMM-8-1438-s001.pdf]

## Expanded View Figures

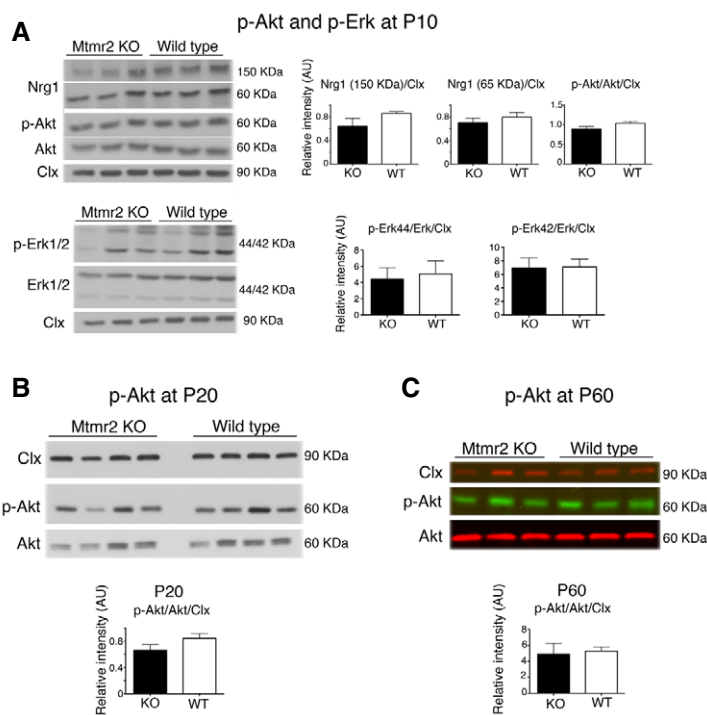

**Figure EV1. Expression levels of Nrg1 and phosphorylation of Erk and Akt in *Mtmr2*<sup>-/-</sup> nerves.**

- A Phosphorylation of either Akt (S473) or Erk1/2 (44 and 42 kDa) and Nrg1 expression levels are similar between WT and *Mtmr2*<sup>-/-</sup> sciatic nerves at P10, with quantification. Representative of two independent experiments. Nrg1 (150 kDa),  $P = 0.7$ ; Nrg1 (65 kDa),  $P = 0.4$ ; p-Akt,  $P = 0.2$ ; p-Erk 44,  $P = 0.7$ ; p-Erk 42,  $P = 1$ , two-tailed Mann–Whitney  $U$ -test. Clx, calnexin.
- B, C Phosphorylation of Akt (S473) at P20 (B) and at P60 (C) is similar between WT and *Mtmr2*<sup>-/-</sup> sciatic nerves, with quantification. Representative of two independent experiments. p-Akt,  $P = 0.2$  at P20 and  $P = 0.7$  at P60, two-tailed Mann–Whitney  $U$ -test. Clx, calnexin.

Data information: Results are expressed as mean  $\pm$  SEM.

Source data are available online for this figure.

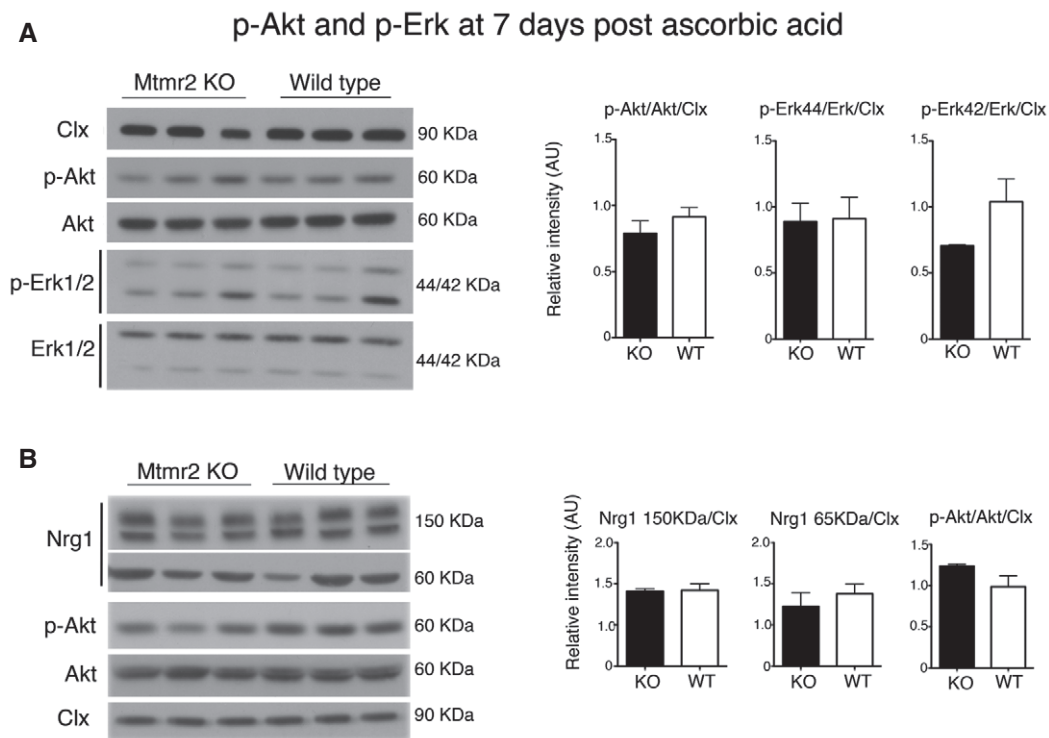

**Figure EV2. Expression levels of Nrg1 and phosphorylation of Erk and Akt in *Mtmr2*<sup>-/-</sup> co-cultures at 7 days postdifferentiation.**

A Western blot analysis and corresponding quantification of lysates from *Mtmr2*<sup>-/-</sup> and WT DRG explants after 7 days of ascorbic acid treatment. Each lane is a lysate from at least 10 DRGs per condition/genotype. Phosphorylation of either Akt (S473) or Erk1/2 (44 and 42 kDa) is similar between WT and *Mtmr2*<sup>-/-</sup> explants. Representative of two independent experiments.

B Expression levels of either Nrg1 full-length (150 kDa) or cleaved Nrg1 (65 kDa) are similar between the two genotypes. p-Akt,  $P = 0.353$  upper panel and  $P = 0.1373$  lower panel; p-Erk 44,  $P = 0.9284$ ; p-Erk 42,  $P = 0.1274$ ; Nrg1 (150 kDa),  $P = 0.8897$ ; Nrg1 (65 kDa),  $P = 0.4966$ ; two-tailed Mann-Whitney  $U$ -test. Clx, calnexin.

Data information: Results are expressed as mean  $\pm$  SEM.  
Source data are available online for this figure.

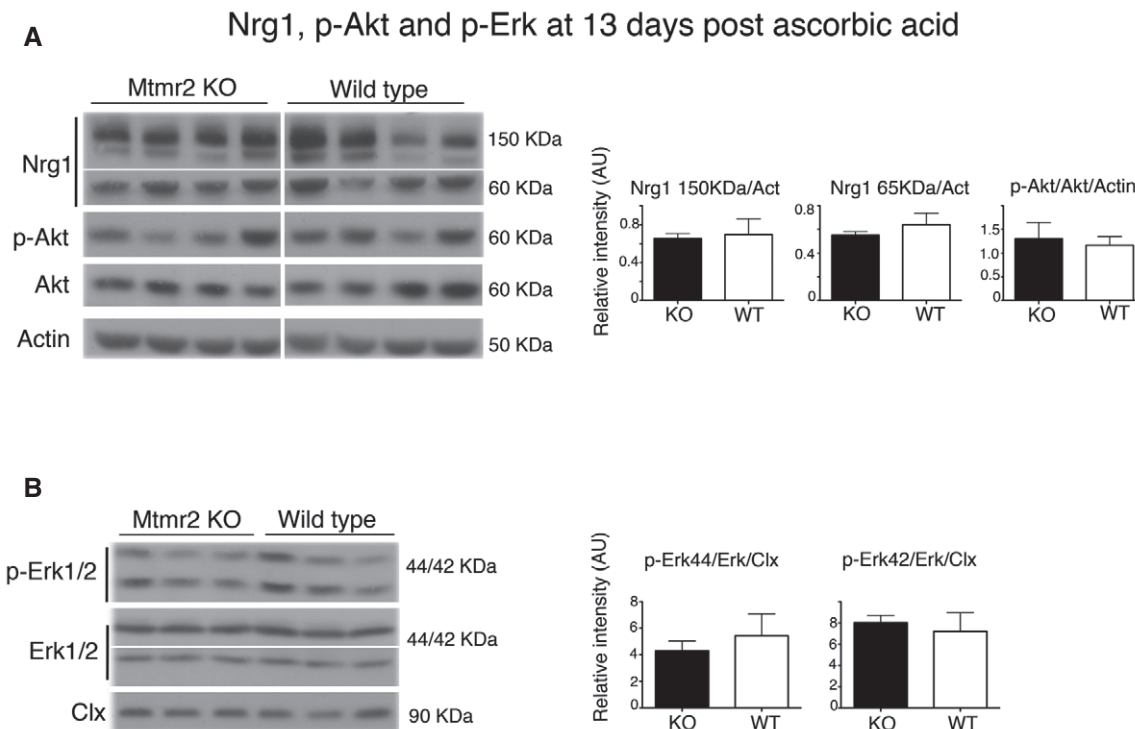

**Figure EV3. Expression levels of Nrg1 and phosphorylation of Erk and Akt in *Mtmr2*<sup>-/-</sup> co-cultures at 13 days postdifferentiation.**

A, B Western blot analysis and corresponding quantification of lysates from *Mtmr2*<sup>-/-</sup> and WT DRG explants after 13 days of ascorbic acid treatment. Each lane is a lysate from a pool of at least 10 DRGs per condition/genotype,  $n = 3/4$  different pools per genotype. Results are mean  $\pm$  SEM; Nrg1 (150 kDa)  $P = 1$ ; Nrg1 (65 kDa)  $P = 0.4857$ ; p-Akt  $P = 1$ ; p-Erk 44  $P = 0.7$ ; p-Erk 42  $P = 1$ ; two-tailed Mann–Whitney  $U$ -test. Clx, calnexin.

Source data are available online for this figure.

**Figure EV4. Niacin acts through Tace to modulate myelination in *Mtmr2*<sup>-/-</sup> cultures.**

- A Quantitative RT–PCR analysis using mRNA from isolated rat Schwann cells transduced with Tace shRNA LV (three different harpins tested). NI, not infected; SCR, scramble shRNA LV. Representative of two independent experiments.
- B Quantification of Mbp-positive myelin segments in wild-type cultures transduced with Tace shRNA LVs as compared to NI and transduced with scramble shRNA. DRGs/coverlips: NI  $n = 6$ ; SCR  $n = 4$ ; sh#1  $n = 4$ .  $P = 0.0181$ , nonparametric one-way ANOVA, followed by Dunn's *post hoc* test.
- C Representative of *Mtmr2*<sup>-/-</sup> explants transduced with scramble shRNA (GFP tag) shows that neurons were preferentially transduced by LVs when infection was made 1 day after plating the DRGs.
- D, E Representative confocal images of *Mtmr2*<sup>-/-</sup> co-cultures transduced using LV expressing shRNA scramble (SCR) or Tace shRNA #1 and treated or not treated (NT) using 5 mM niacin, with quantification in (E).  $N = 6$  DRGs/coverlips per condition; 200 fibers scored per condition;  $P = 0.0425$ , nonparametric one-way ANOVA, followed by Dunn's *post hoc* test.

Data information: Results in (A, B, and E) are mean  $\pm$  SEM. Dunn's *post hoc* test,  $*P < 0.05$ .

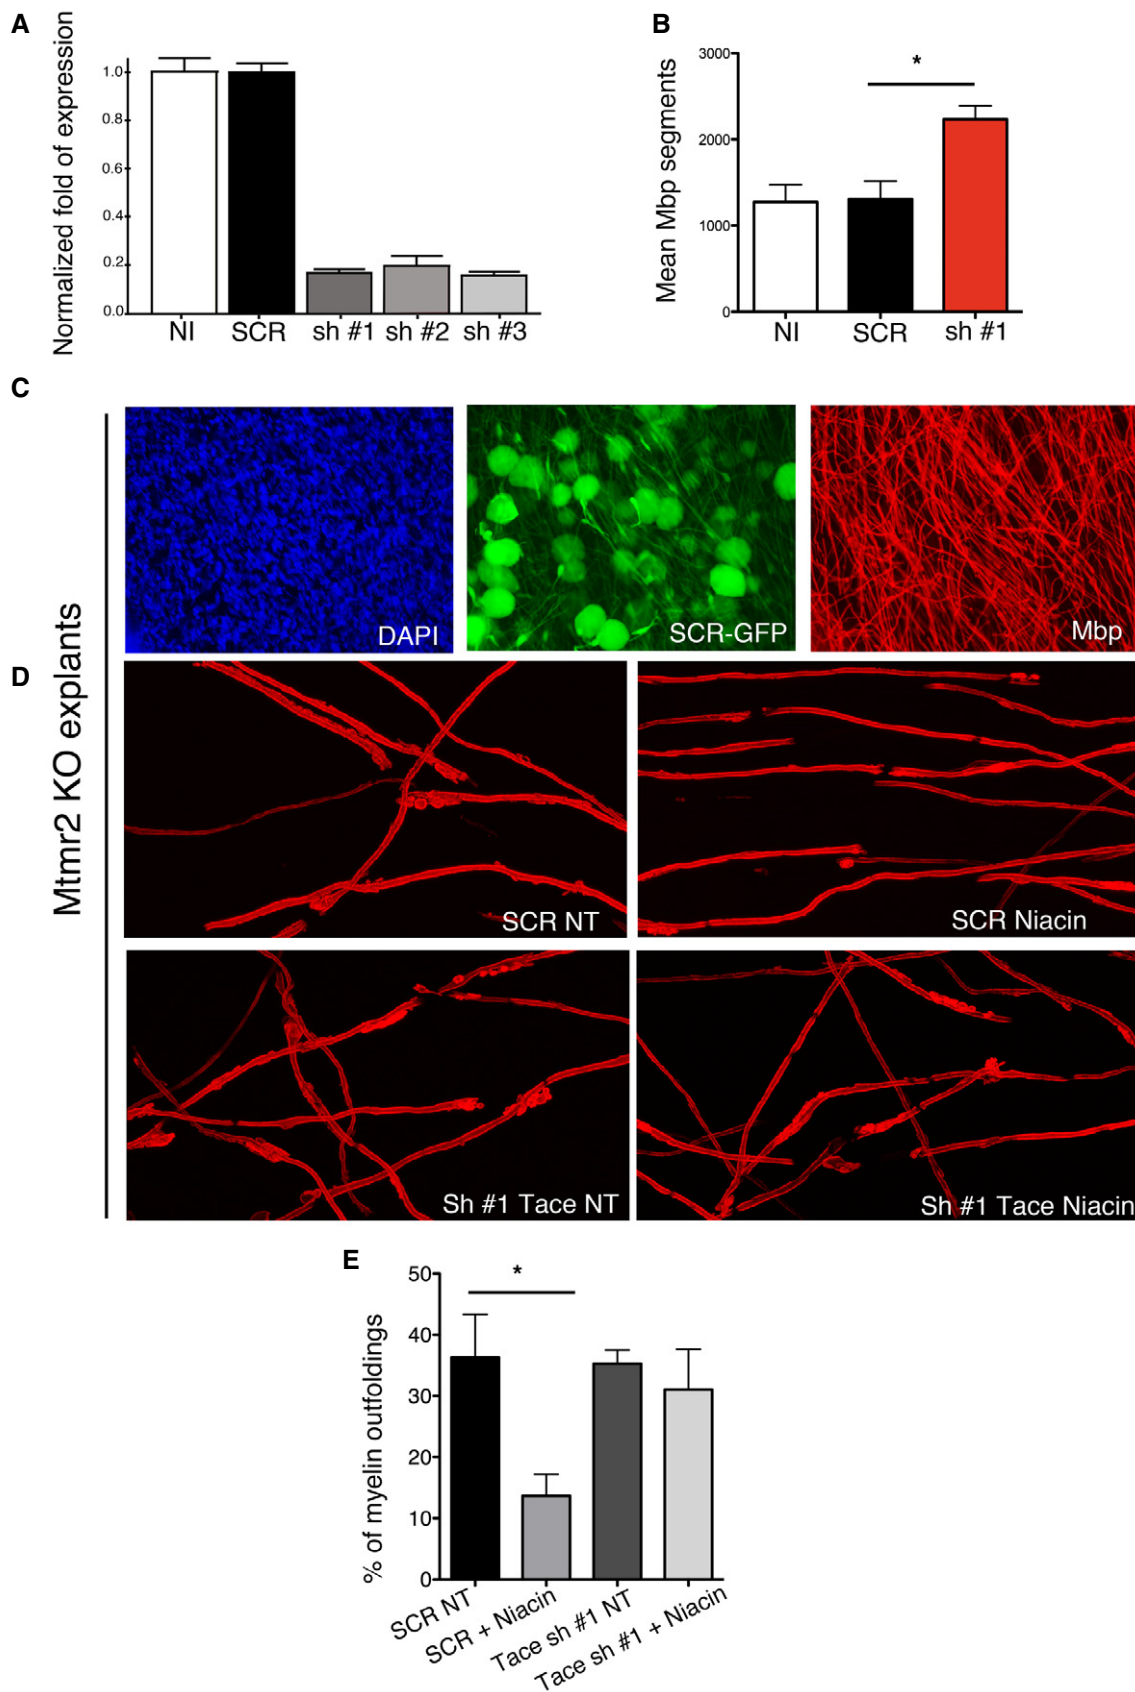

Figure EV4.

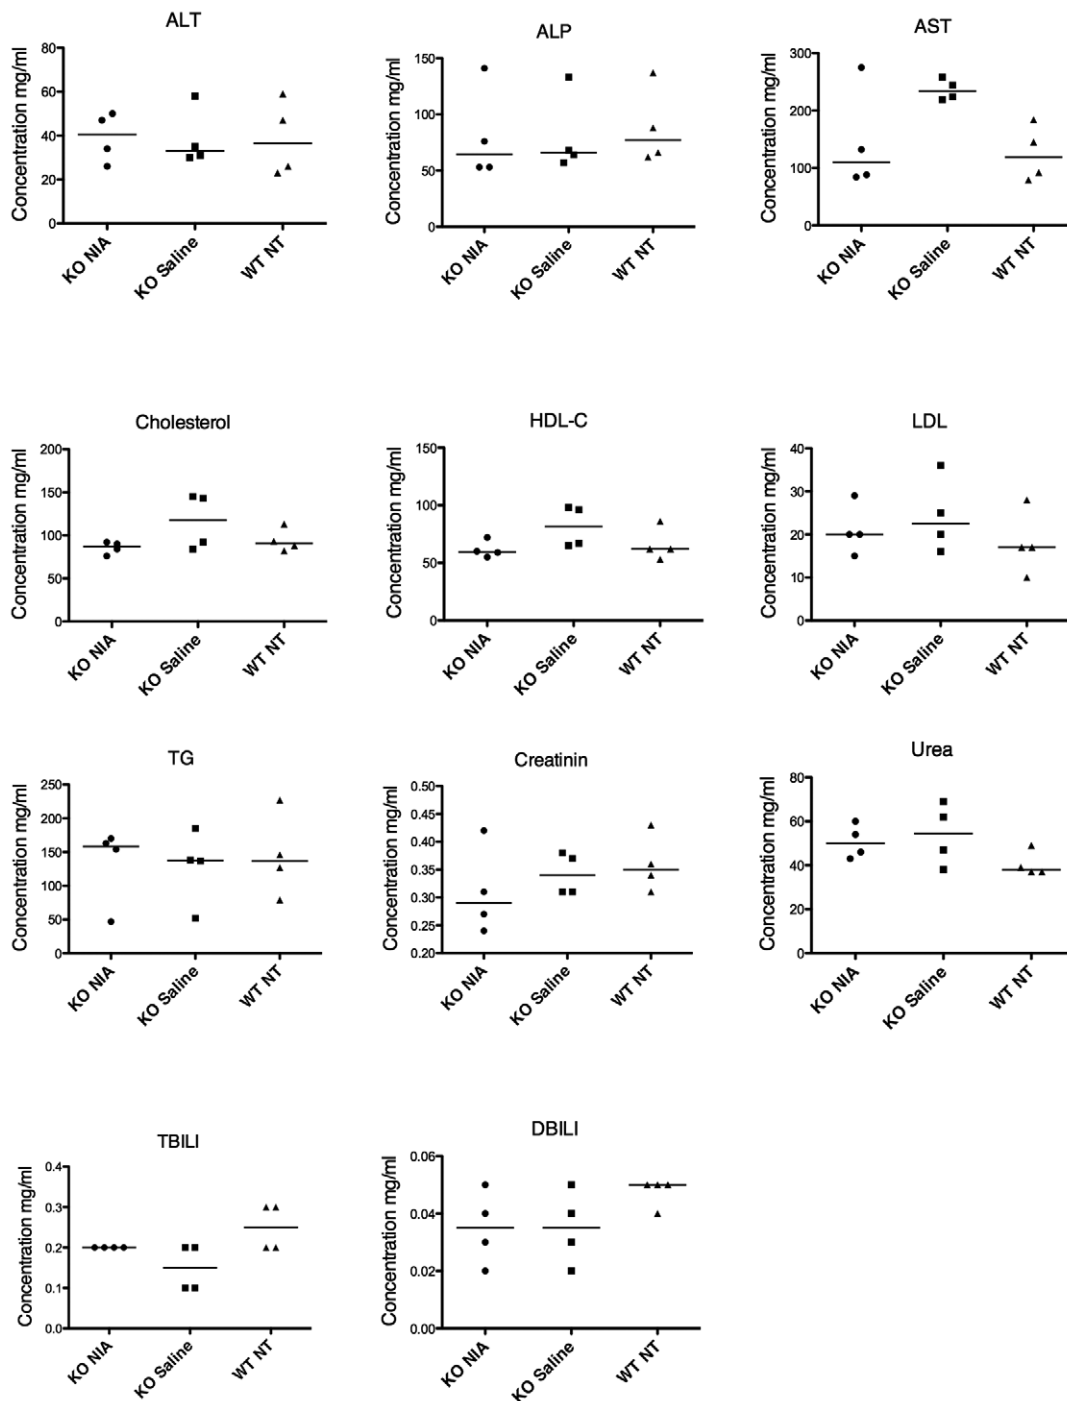

**Figure EV5. Bioclinical analysis in *Mtmr2*<sup>-/-</sup> mice treated with Niaspan for 2 months (160 mg/kg/day) starting at P15.**

ALT, alanine transaminase; ALP, alkaline phosphatase; AST, aspartate transaminase; HDL-C, high-density lipoprotein cholesterol; LDL, low-density lipoprotein cholesterol; TG, triglycerides; TBILI, bilirubin; DBILI, direct bilirubin, conjugated. Results are median values, nonparametric one-way ANOVA, followed by Dunn's *post hoc* tests. No significant differences are observed by comparing the three groups for all the tested parameters: ALT  $P = 0.9436$ ; ALP  $P = 0.7781$ ; AST  $P = 0.1160$ ; cholesterol  $P = 0.2895$ ; HDL-C  $P = 0.1152$ ; LDL  $P = 0.5451$ ; TG  $P = 0.9260$ ; creatinine  $P = 0.4059$ ; urea  $P = 0.1662$ ; TBILI  $P = 0.0639$ ; DBILI  $P = 0.2046$ , representative of two independent experiments.

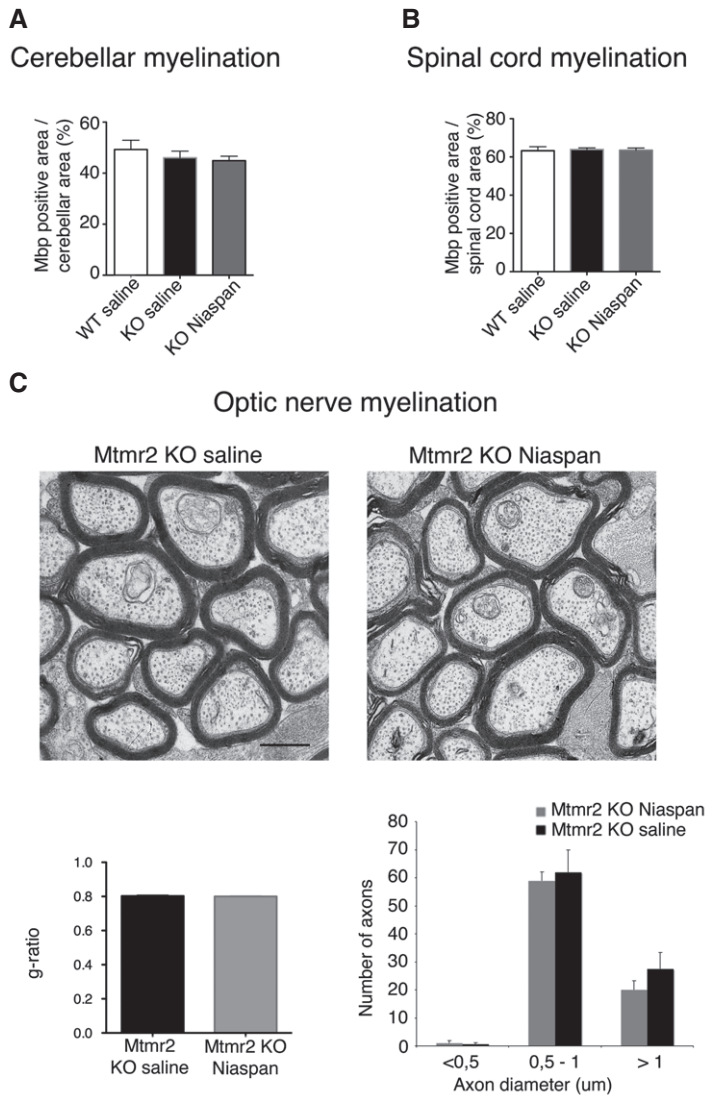

**Figure EV6. Normal CNS myelination in *Mtmr2*<sup>-/-</sup> mice following Niaspan treatment at 2.5 months.**

- A** Mbp staining on frozen brain (cerebellum) sections from *Mtmr2*<sup>-/-</sup> mice (Niaspan- and saline-treated) and WT saline-treated mice. Quantification of Mbp staining over the area indicates that myelinated tracts are not affected by Niaspan treatment,  $n = 5$  animals per condition,  $P = 0.4054$ , nonparametric one-way ANOVA, followed by Dunn's *post hoc* test.
- B** Mbp staining in spinal cord sections (at two different levels) of *Mtmr2*<sup>-/-</sup> mice (Niaspan- and saline-treated) and WT saline-treated mice. Quantification of Mbp staining in the spinal cord area indicated that myelinated tracts were not affected by Niaspan treatment,  $n = 5$  animals per condition,  $P = 0.9324$ , nonparametric one-way ANOVA, followed by Dunn's *post hoc* test.
- C** Ultrastructural and g-ratio analyses of optic nerves from *Mtmr2*<sup>-/-</sup> saline- and Niaspan-treated mice show normal myelin thickness in the two groups of mutants,  $n = 5$  animals per condition (*Mtmr2*<sup>-/-</sup> saline,  $0.8 \pm 0.004$ , 450 fibers and *Mtmr2*<sup>-/-</sup> Niaspan  $0.8 \pm 0.002$ , 400 fibers;  $n = 5$  animals per genotype;  $P = 0.5728$ , repeated-measures ANOVA). Scale bar, 1  $\mu\text{m}$ .

Data information: Results are expressed as mean  $\pm$  SEM.
