# Supplementary material for: Niacin‐mediated Tace activation ameliorates CMT neuropathies with focal hypermyelination
Source: PubMed Central journal article supplement (PMC5167133; doi:10.15252/emmm.201606349), 2016-10-31

Figure 1 panel A

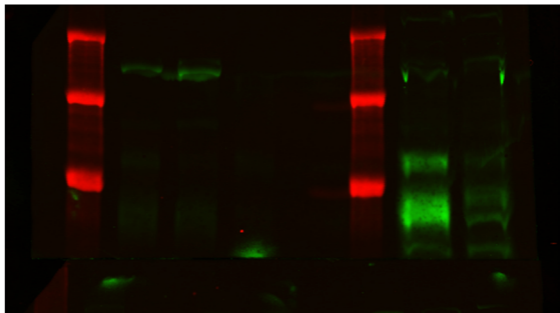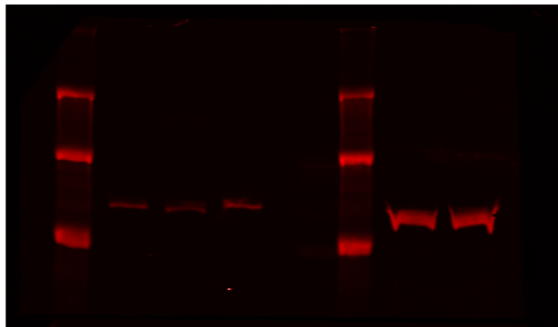

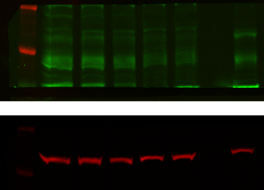

Figure 1 panel B

Figure 1 panel C

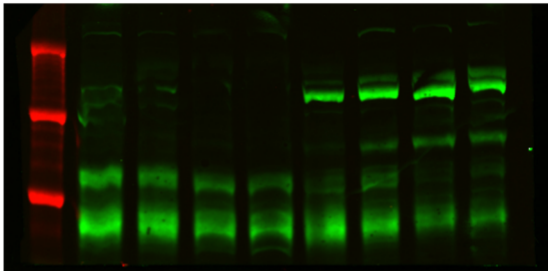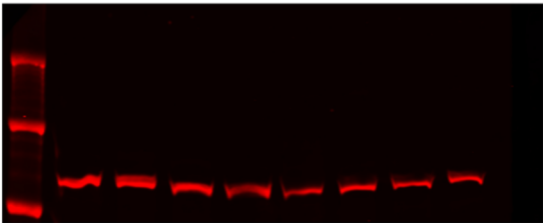

Figure 1 D

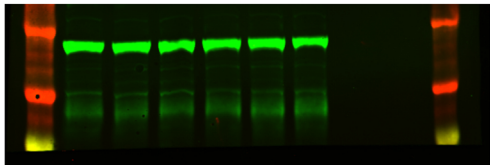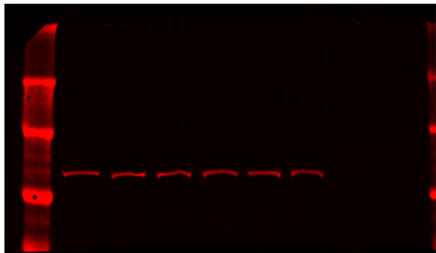

# Panel E at P2

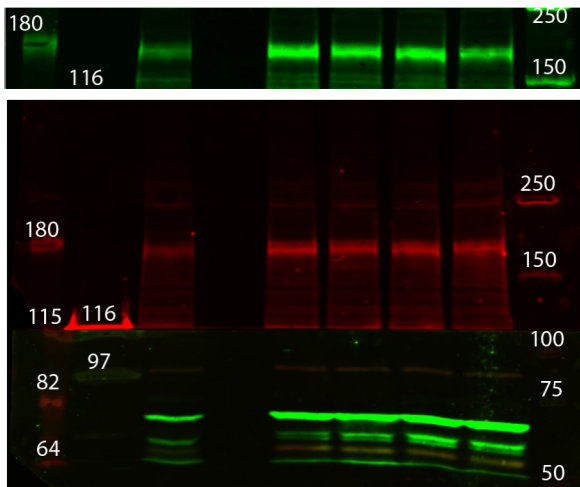

# Panel E at P10

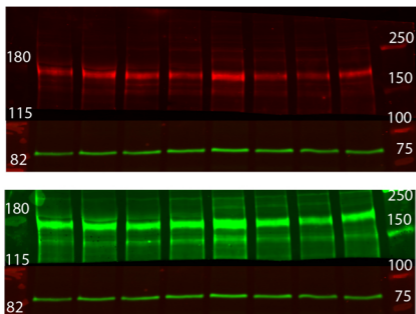

Figure 1 panel F

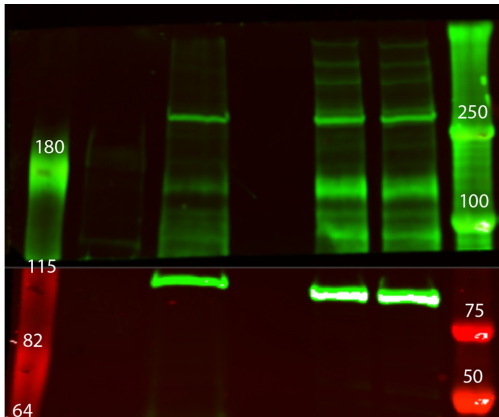

Supplement: EMMM-8-1438-s002.pdf [file EMMM-8-1438-s002.pdf]
