# Supplementary material for: Niacin‐mediated Tace activation ameliorates CMT neuropathies with focal hypermyelination
Source: PubMed Central journal article supplement (PMC5167133; doi:10.15252/emmm.201606349), 2016-10-31

Figure 5 panel A

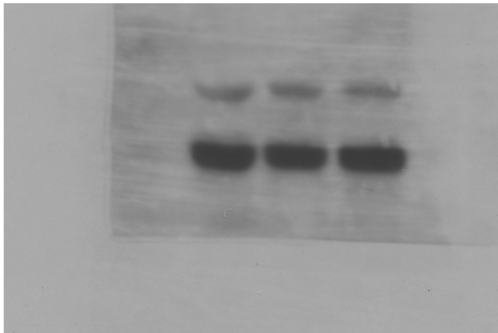

Akt tot

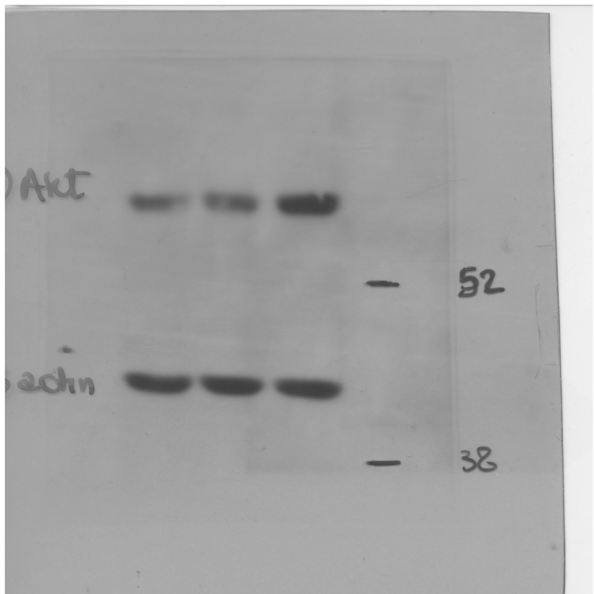

Supplement: EMMM-8-1438-s006.pdf [file EMMM-8-1438-s006.pdf]
