# Supplementary material for: Niacin‐mediated Tace activation ameliorates CMT neuropathies with focal hypermyelination
Source: PubMed Central journal article supplement (PMC5167133; doi:10.15252/emmm.201606349), 2016-10-31

Figure 8 panel A

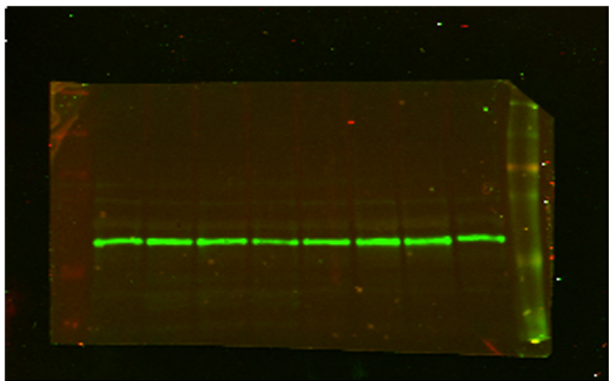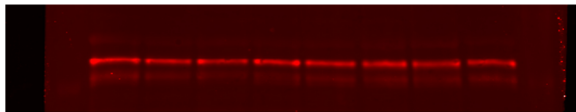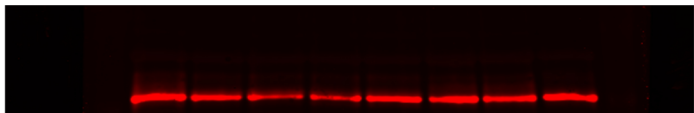

Figure 8 panel B

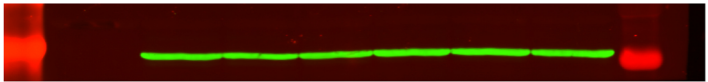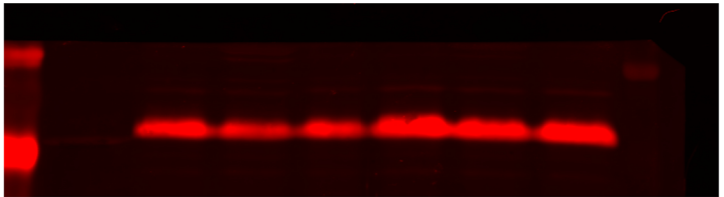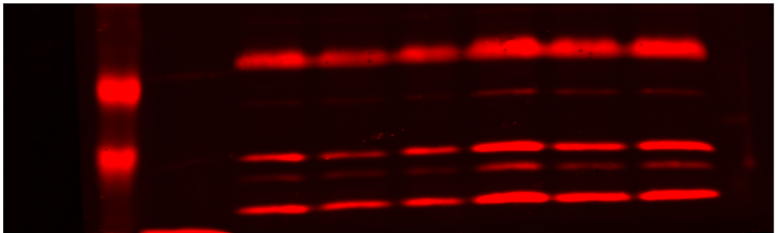

Supplement: EMMM-8-1438-s008.pdf [file EMMM-8-1438-s008.pdf]
